# Supplementary material for: Loss of Nupr1 promotes engraftment by tuning the quiescence threshold of hematopoietic stem cell repository via regulating p53-checkpoint pathway
Source: bioRxiv or medRxiv preprint supplement (doi:10.1101/2020.07.16.205898), 2020-09-15
Supplement: Supplementary file [file media-1.pdf]

1 **Supplementary Figures**

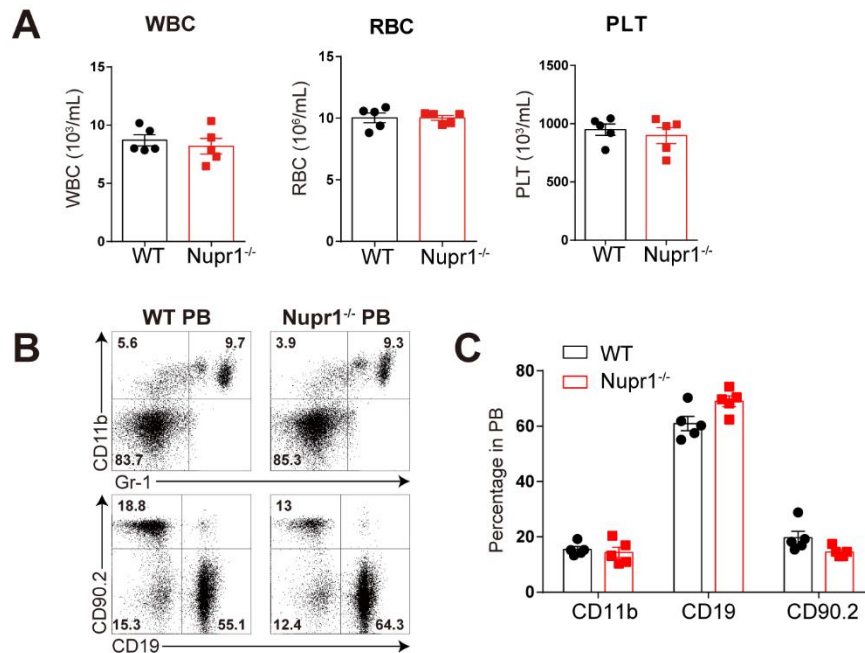

2

3 **Supplementary fig 1. The hematopoiesis of *Nupr1*<sup>-/-</sup> mice was normal**

4 (A) Complete blood counts of peripheral blood from WT mice and *Nupr1*<sup>-/-</sup> mice.

5 Eight-ten-week-old mice were used for detection. WBC: white blood cells; RBC: red  
6 blood cells; PLT: platelets.

7 (B) Flow cytometry analysis of lineage cells in peripheral blood from WT mice and  
8 *Nupr1*<sup>-/-</sup> mice. Myeloid cells were detected by CD11b<sup>+</sup>; Granulocytes were detected  
9 by Gr-1<sup>+</sup>; B lymphocytes were detected by CD19<sup>+</sup>; T lymphocytes were detected by  
10 CD90.2<sup>+</sup>.

11 (C) Statistical analysis of lineage percentage in peripheral blood from WT mice and  
12 *Nupr1*<sup>-/-</sup> mice.

13

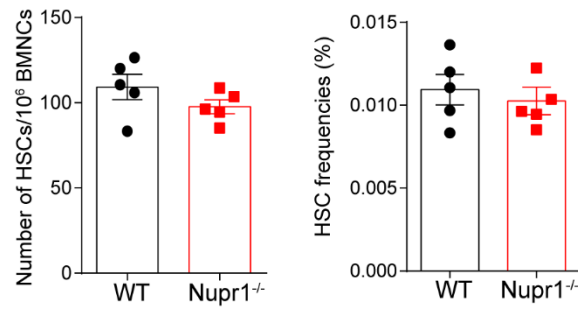

14

15 **Supplementary fig 2. The number and frequency of HSCs were compatible**

16 **between WT and *Nupr1*<sup>-/-</sup> HSC**

17
